# Supplementary material for: Group size, survival and surprisingly short lifespan in socially foraging bats
Source: BMC Ecol. 2016 Jan 15;16:2. doi: 10.1186/s12898-016-0056-1 (PMC4714502; doi:10.1186/s12898-016-0056-1)
Supplement: Supplementary file 2 — 10.1186/s12898-016-0056-1: Survival dataset with estimated lifespan from 114 recaptures of 70 females analysed with Cox PH models. The columns respectively represent the individual transponder (1), the capture site (2), the capture date (3), the minimum survival time in days (4), the estimated survival time from birth in days (5), the censoring of the observation (6), the total group size at previous capture (adults and juveniles) (7), and the adult group size at previous capture (8). [file 12898_2016_56_MOESM2_ESM.csv]

transponder	site	date	surv_days	survcor_days	surv_status	tgs_prevcap	ags_prevcap
002F1	164	2013-09-12	41	132.5	0	22	22
2FF39	164	2012-07-16	482	787	1	13	13
2FF39	164	2013-02-28	709	1014	1	18	15
2FF39	164	2013-09-12	905	1210	0	11	10
30129	271	2012-07-24	487	792	1	9	9
30129	271	2013-07-20	848	1153	1	12	7
302AF	164	2012-04-13	388	693	1	13	13
30E64	154A	2013-03-12	460	673.5	0	8	8
3252D	164	2012-07-16	482	787	1	13	13
32C2B	152A	2012-07-12	95	430.5	1	10	10
32C2B	152A	2014-05-18	770	1105.5	0	21	10
32E7F	164	2012-07-16	482	787	1	13	13
32E7F	164	2013-02-28	709	1014	1	18	15
32E7F	164	2013-09-12	905	1210	0	11	10
73D92	165	2013-07-16	142	416.5	1	13	13
73D92	165	2013-08-07	164	438.5	1	14	7
73D92	165	2013-12-09	288	562.5	1	6	6
73D92	165	2014-05-22	452	726.5	0	10	10
74474	164	2013-08-02	382	443	1	18	15
74474	164	2013-09-12	423	484	0	22	22
7D811	165	2013-07-16	142	416.5	1	13	13
7D811	165	2013-11-14	263	537.5	1	14	7
7D811	165	2014-05-22	452	726.5	0	12	12
7E6E2	270	2013-08-08	121	456.5	1	12	12
85584	165	2013-07-16	142	416.5	1	13	13
85584	165	2013-12-09	288	562.5	1	14	7
8615A	164	2013-09-12	196	470.5	0	11	10
8703F	270	2013-08-08	121	456.5	1	12	12
880CC	152A	2013-02-22	225	286	1	21	10
880CC	152A	2013-07-11	364	425	1	4	4
88441	164	2013-02-28	227	288	1	18	15
88441	164	2013-08-02	382	443	1	11	10
89700	152A	2013-11-20	496	557	1	21	10
89700	152A	2014-05-18	675	736	0	14	14
8A368	165	2013-07-16	142	416.5	1	13	13
8A368	165	2013-08-07	164	438.5	1	14	7
8A737	270	2013-08-08	121	456.5	1	12	12
8A737	270	2013-12-07	242	577.5	0	17	11
8A7B2	152A	2013-02-22	225	286	1	21	10
8A7B2	152A	2013-07-11	364	425	1	4	4
8F479	270	2013-08-08	121	456.5	1	12	12
A808B	164	2013-09-12	41	132.5	0	22	22
A95A3	164	2013-09-12	41	132.5	0	22	22
A96FE	275	2014-05-27	177	390.5	0	22	22
AA977	164	2013-09-12	41	132.5	0	22	22
AAF45	164	2013-09-12	41	132.5	0	22	22
ABC67	164	2013-09-12	41	132.5	0	22	22
AC150	165	2013-11-14	66	188	1	3	3
AD049	451	2013-11-19	120	181	0	26	13
B46AF	154B	2013-04-01	260	321	0	8	6
B75B1	270	2013-08-08	121	456.5	1	12	12
B75B1	270	2013-12-07	242	577.5	0	17	11
CBFB0	152A	2014-05-18	5	371	0	1	1
D951A	275	2014-05-27	308	369	0	26	15
D9882	165	2014-05-22	189	372	0	12	12
DA09F	275	2013-12-01	131	192	1	26	15
DA09F	275	2014-05-27	308	369	0	22	22
DABCB	164	2013-09-12	41	132.5	0	22	22
DB5A2	164	2013-09-12	41	132.5	0	22	22
DB978	164	2013-09-12	41	132.5	0	22	22
DCD18	275	2014-05-27	308	369	0	26	15
DCFDF	164	2013-09-12	41	132.5	0	22	22
DDCC2	164	2013-09-12	41	132.5	0	22	22
DEF04	152A	2014-05-18	179	362	0	14	14
E7C46	164	2013-09-12	196	470.5	0	11	10
E7E0D	154A	2011-12-08	4	217.5	1	7	7
E7E0D	154B	2012-07-15	224	437.5	1	8	8
E7EB3	164	2012-04-13	388	693	1	13	13
E7EB3	164	2012-07-16	482	787	1	4	4
E7EB3	164	2013-02-28	709	1014	1	18	15
E7EB3	164	2013-08-02	864	1169	1	11	10
E7EB3	164	2013-09-12	905	1210	0	22	22
E7EC7	154B	2012-04-11	125	338.5	1	8	8
E7EC7	154B	2012-07-15	220	433.5	1	5	5
E815A	271	2011-12-01	251	556	1	9	9
E815A	271	2012-04-12	384	689	1	3	3
E815A	271	2012-07-24	487	792	1	5	5
E828E	154A	2011-12-04	260	565	1	5	5
E828E	154A	2011-12-08	264	569	1	7	7
E828E	154A	2012-04-10	388	693	1	8	8
E828E	154A	2012-07-14	483	788	1	3	3
E828E	154A	2013-03-12	724	1029	0	8	5
E82FD	271	2012-07-24	103	438.5	1	5	5
E83EE	154A	2012-04-10	124	337.5	1	8	8
E86DB	271	2012-04-12	384	689	1	9	9
E86DB	271	2013-07-20	848	1153	1	5	5
E8B50	271	2012-07-24	487	792	1	9	9
E8D37	152A	2013-02-22	320	655.5	1	10	10
E8D37	152A	2014-05-18	770	1105.5	0	4	4
E8FE6	164	2012-07-16	482	787	1	13	13
E91F7	154B	2011-12-09	6	219.5	1	4	4
E91F7	154B	2013-04-01	485	698.5	0	7	7
E92F8	154B	2011-12-05	260	565	1	8	8
E92F8	154B	2012-04-11	388	693	1	2	2
E92F8	154B	2013-04-01	743	1048	0	5	5
E9552	164	2012-07-16	482	787	1	13	13
E9552	164	2013-02-28	709	1014	1	18	15
E9552	164	2013-08-02	864	1169	1	11	10
E9552	164	2013-09-12	905	1210	0	22	22
E9B7D	152A	2013-07-11	459	794.5	1	10	10
EAAEB	154A	2012-07-14	95	430.5	1	3	3
EAAEB	154A	2013-03-12	336	671.5	0	8	5
ED15F	257	2014-05-10	295	356	0	26	16
EEBDD	152A	2013-11-20	61	183	1	10	8
EEBDD	150	2014-05-17	239	361	0	14	14
F00CC	257	2014-01-08	173	234	1	26	16
F00D5	275	2014-05-27	177	390.5	0	22	22
F48AC	275	2013-12-01	131	192	1	26	15
F48AC	275	2014-05-27	308	369	0	22	22
F6E06	165	2013-12-09	25	208	1	12	12
F6FDA	164	2013-09-12	41	132.5	0	22	22
F7BAD	451	2013-11-19	120	181	0	26	13
F9EF9	164	2013-09-12	41	132.5	0	22	22
FD93A	257	2014-05-10	295	356	0	26	16
